# Supplementary material for: Structural basis for ELL2 and AFF4 activation of HIV-1 proviral transcription
Source: PubMed Central journal article supplement (PMC5290273; doi:10.1038/ncomms14076), 2017-01-30
Supplement: ncomms14076-s1.pdf [file ncomms14076-s1.pdf]

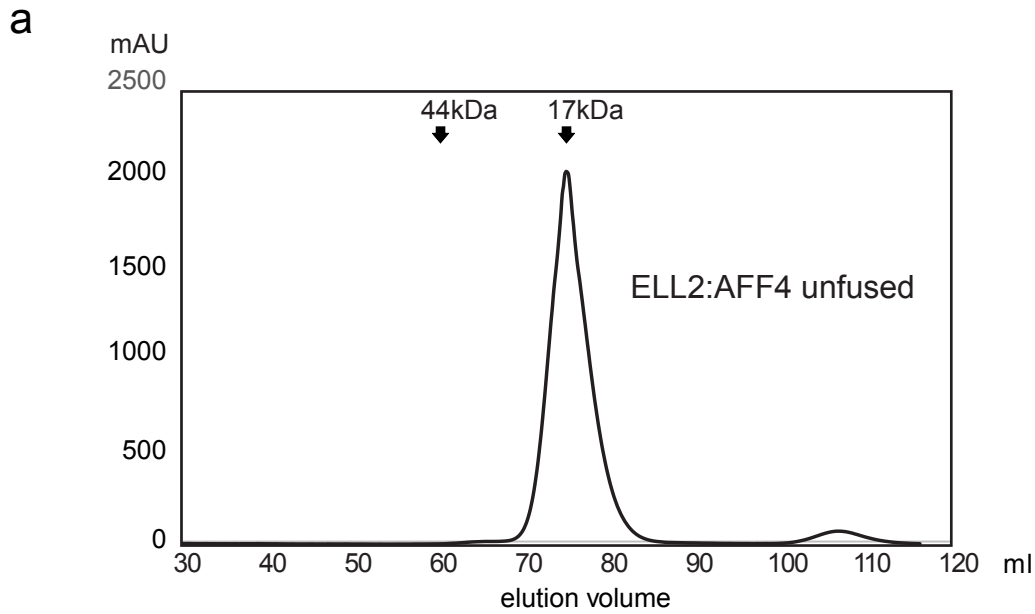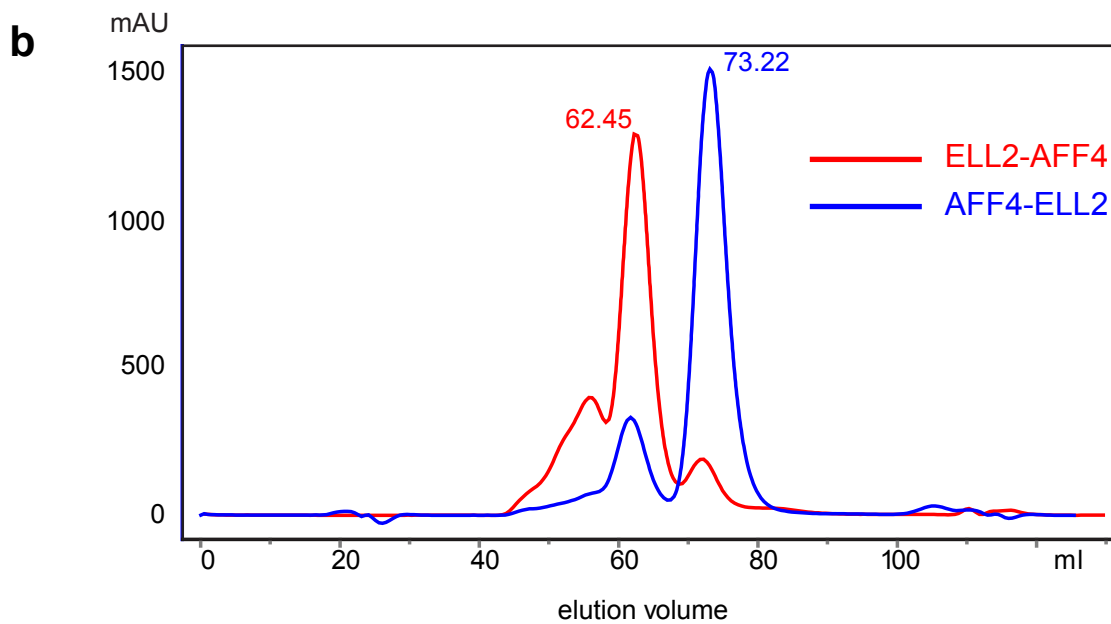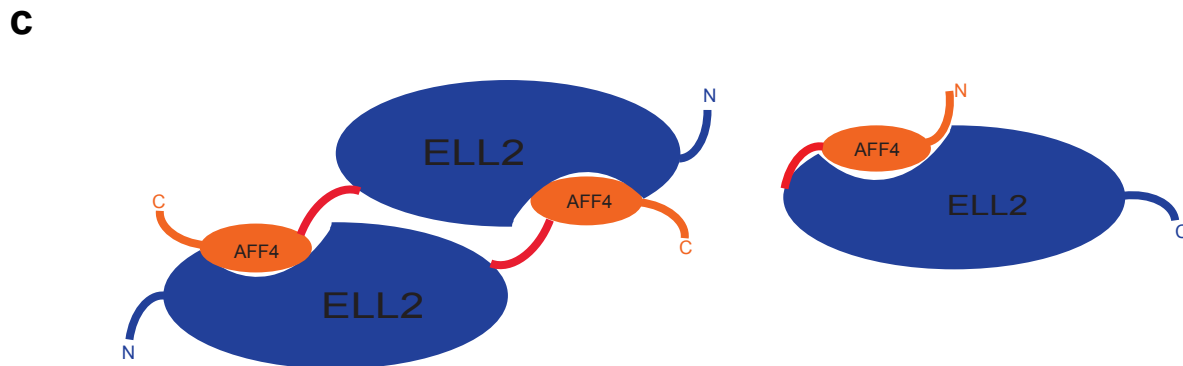

Supplementary Figure 1. a. The unfused ELL2Occ:AFF4ELLBow complex is monomeric in solution. b. The ELL2Occ-(Gly-Ser)<sup>4</sup>-AFF4ELLBow was eluted at 62.45ml on the Hiload 16/60(GE) while AFF4ELLBow-(Gly-Ser)<sup>4</sup>-ELL2Occ was eluted at 73.22 ml, which correspond to a dimer and a monomer, respectively. Red line: ELL2Occ-(Gly-Ser)<sup>4</sup>-AFF4ELLBow, Blue line: AFF4ELLBow-(Gly-Ser)<sup>4</sup>-ELL2Occ. c. Schematic of hypothesis for ELL2Occ-(Gly-Ser)<sup>4</sup>-AFF4ELLBow dimerization in solution while AFF4ELLBow-(Gly-Ser)<sup>4</sup>-ELL2Occ was monomeric. ELL2Occ is shown in blue. AFF4ELLBow is shown in orange. N, C represent amino termini and carboxyl termini respectively.

**a**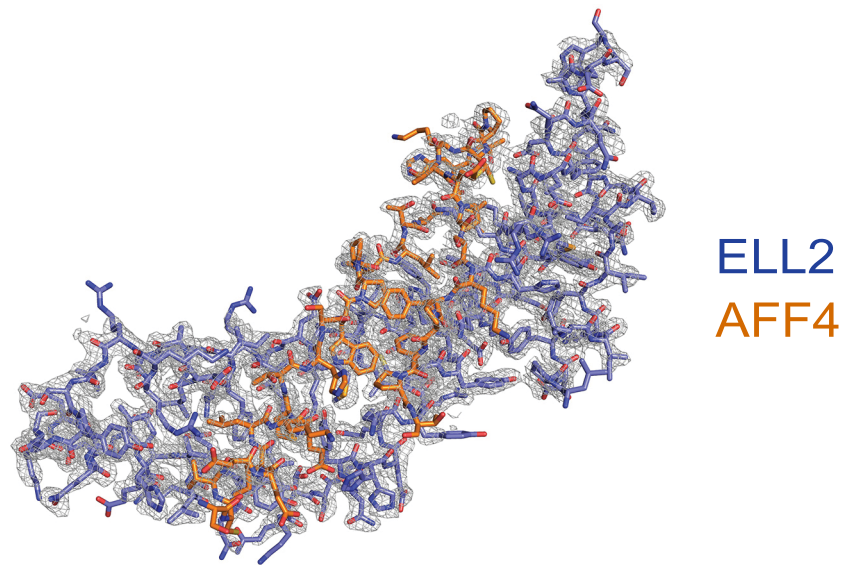**b**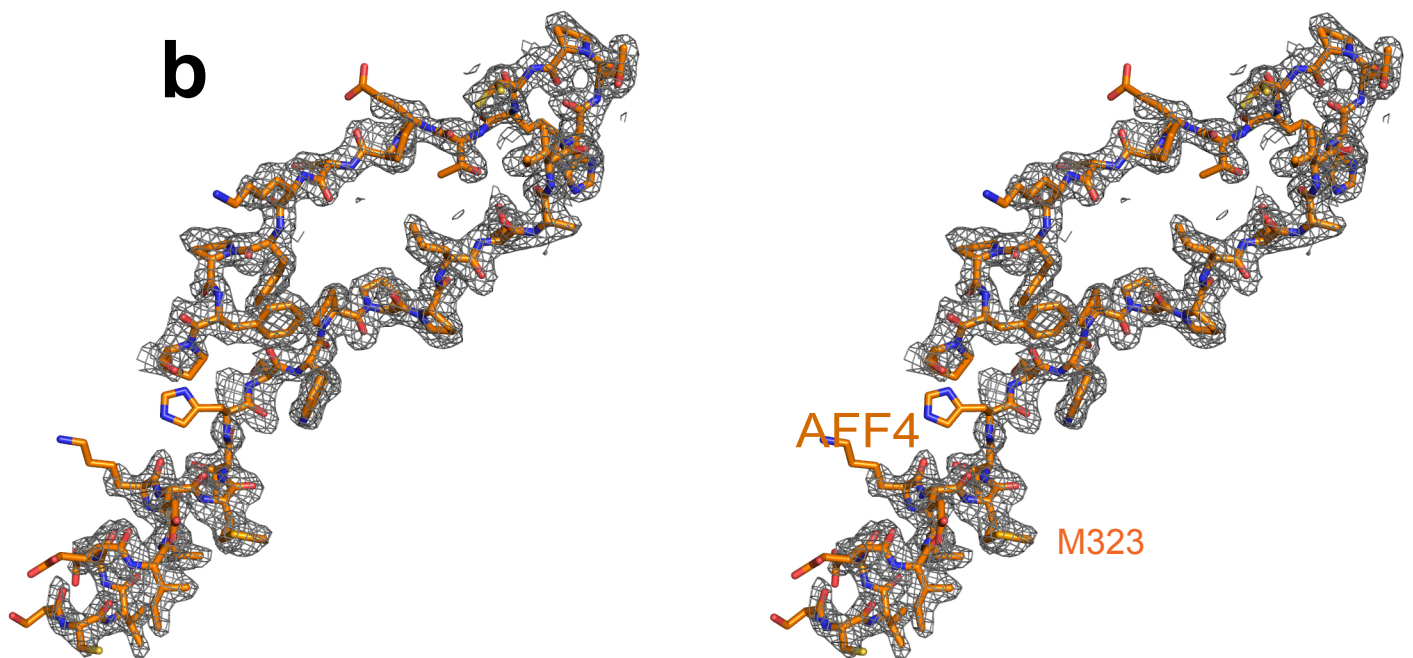

Supplementary Figure 2. a. The overall experimental electron density map after density modification is displayed at a contour level of  $2\sigma$  (gray), with AFF4ELLBow and ELL2Occ shown as stick in orange and light blue, respectively. b. Stereo view of the portion of the map from (A) corresponding to AFF4ELLBow, displayed at a contour level of  $2\sigma$  (gray), with AFF4ELLBow shown in a stick model. Met323 is highlighted.

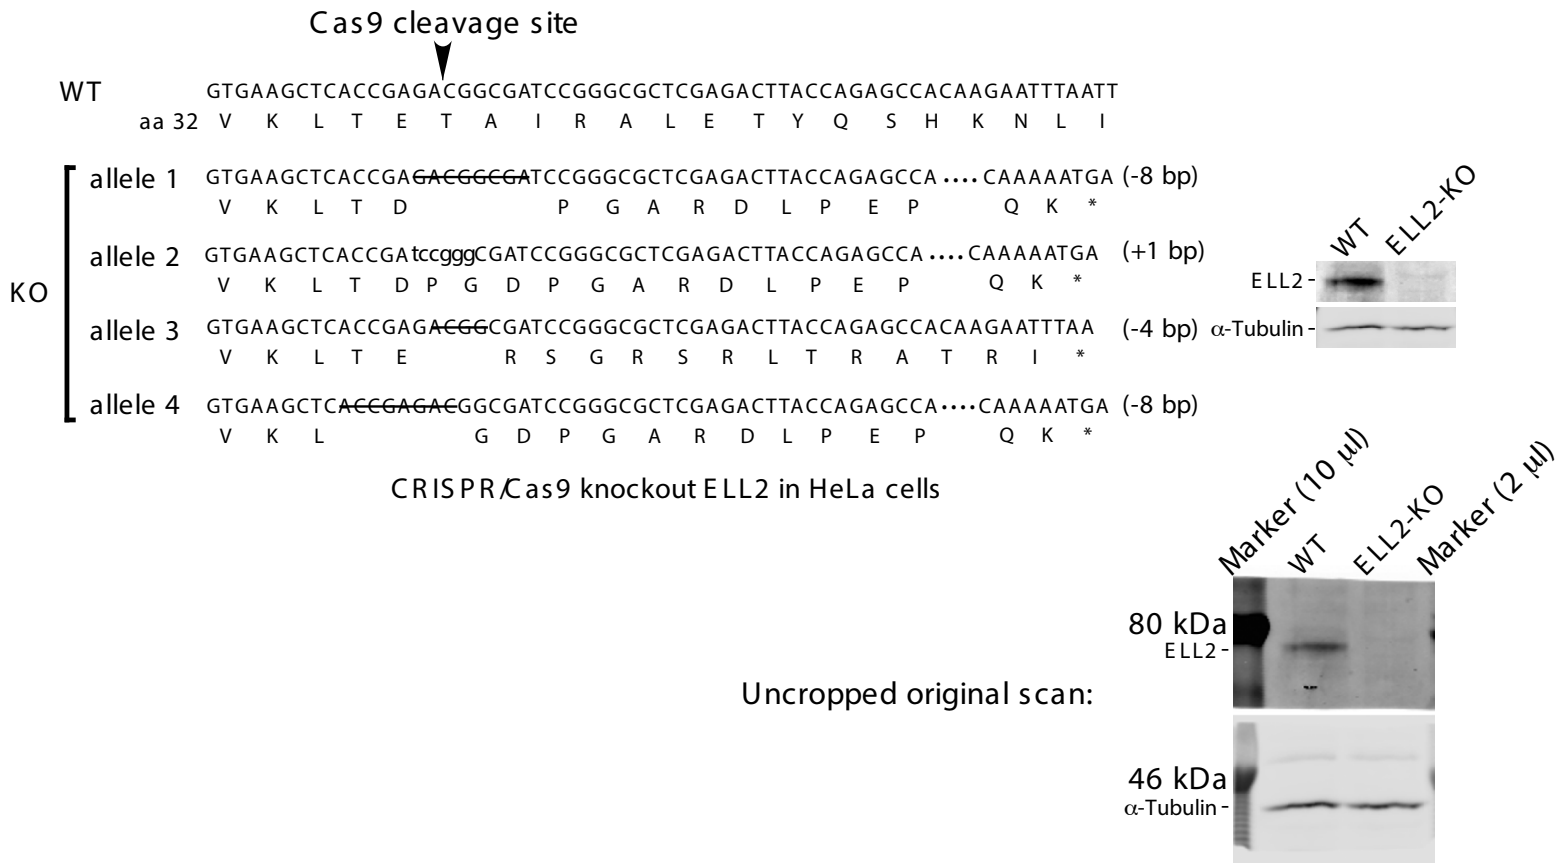

Supplementary Figure 3. Verification of disruption of the ELL2 gene by CRISPR-Cas9 in the HeLa-derived ELL2 knockout cell line  $\Delta$ ELL2. DNA and predicted amino acid sequences surrounding the intended Cas9 cleavage site (arrowhead) in the wild-type ELL2 gene and its mutant alleles generated by CRISPR-Cas9 are shown. Insertions of extra nucleotides are indicated by lowercase letters, deletions are indicated by capital letters containing strike-throughs, and the omitted nucleotides are marked by four consecutive dots. Premature stop codons as a result of frame-shift mutations are indicated by stars. The loss of ELL2 protein expression in  $\Delta$ ELL2 was confirmed by immunoblotting with the indicated antibodies.

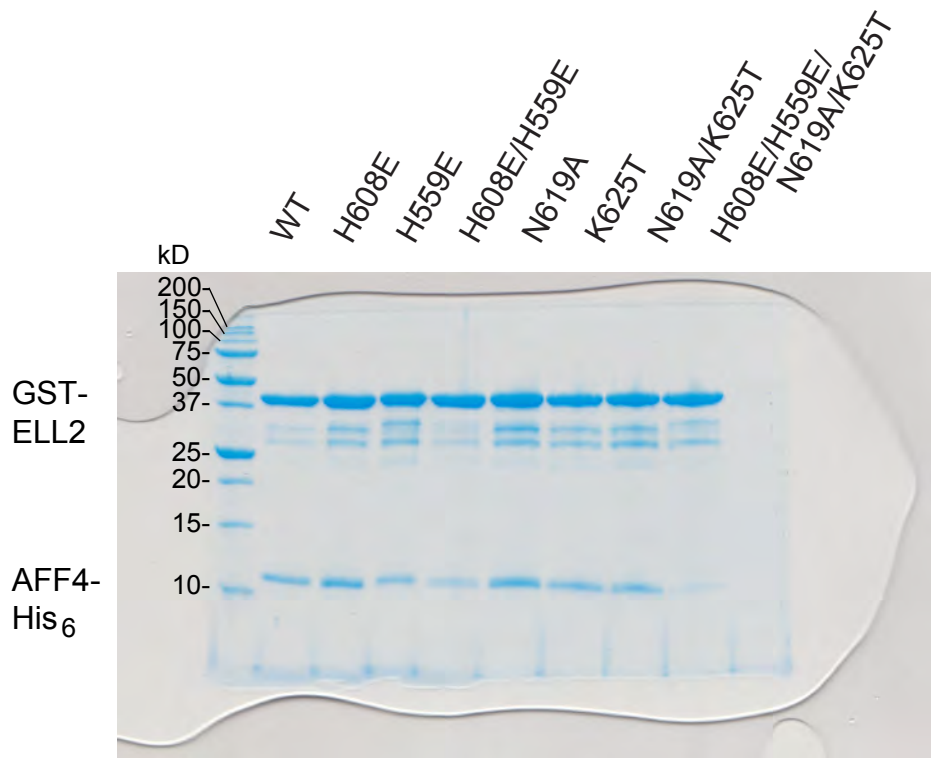

Supplementary Figure 4. Uncropped version of gel shown in Figure 5c.

A

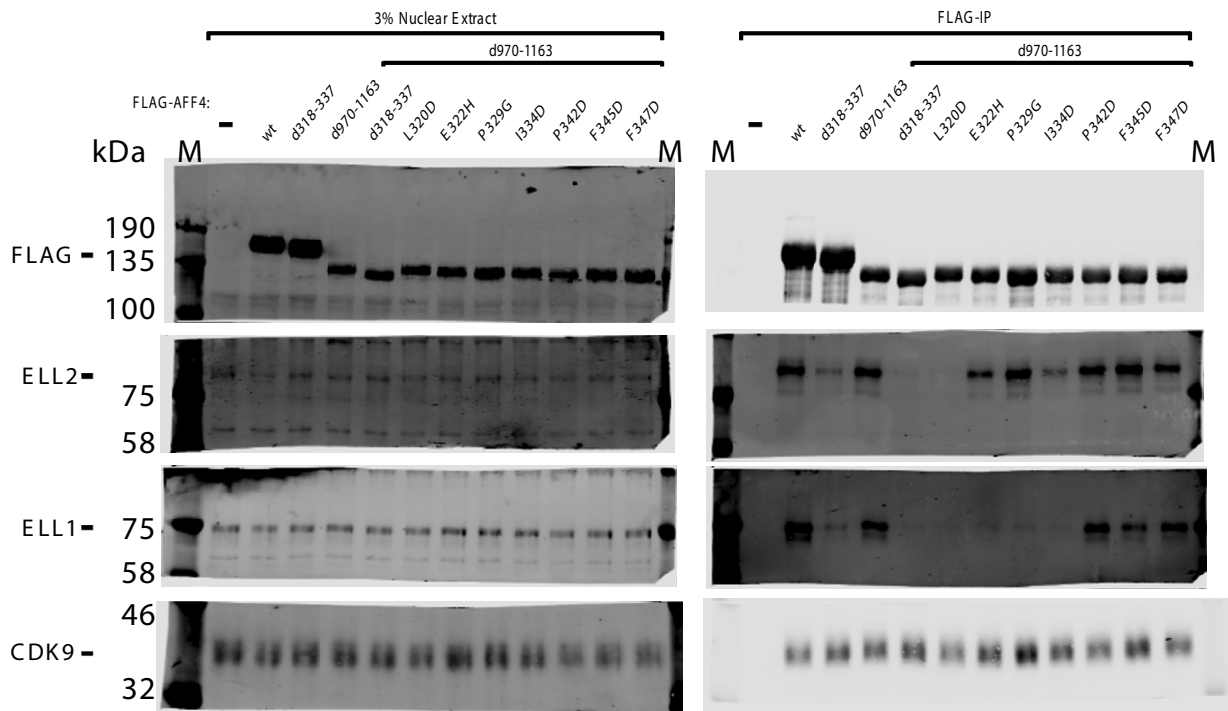

B

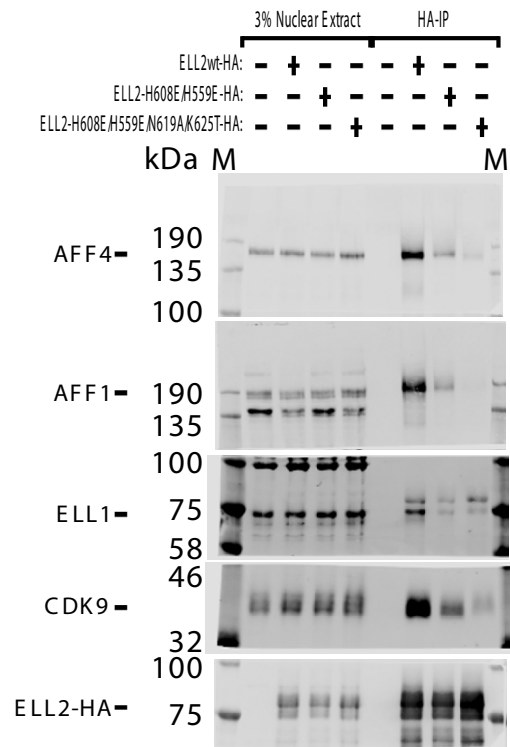

Supplementary Figure 5. Uncropped versions of the gels shown in Figure 6.

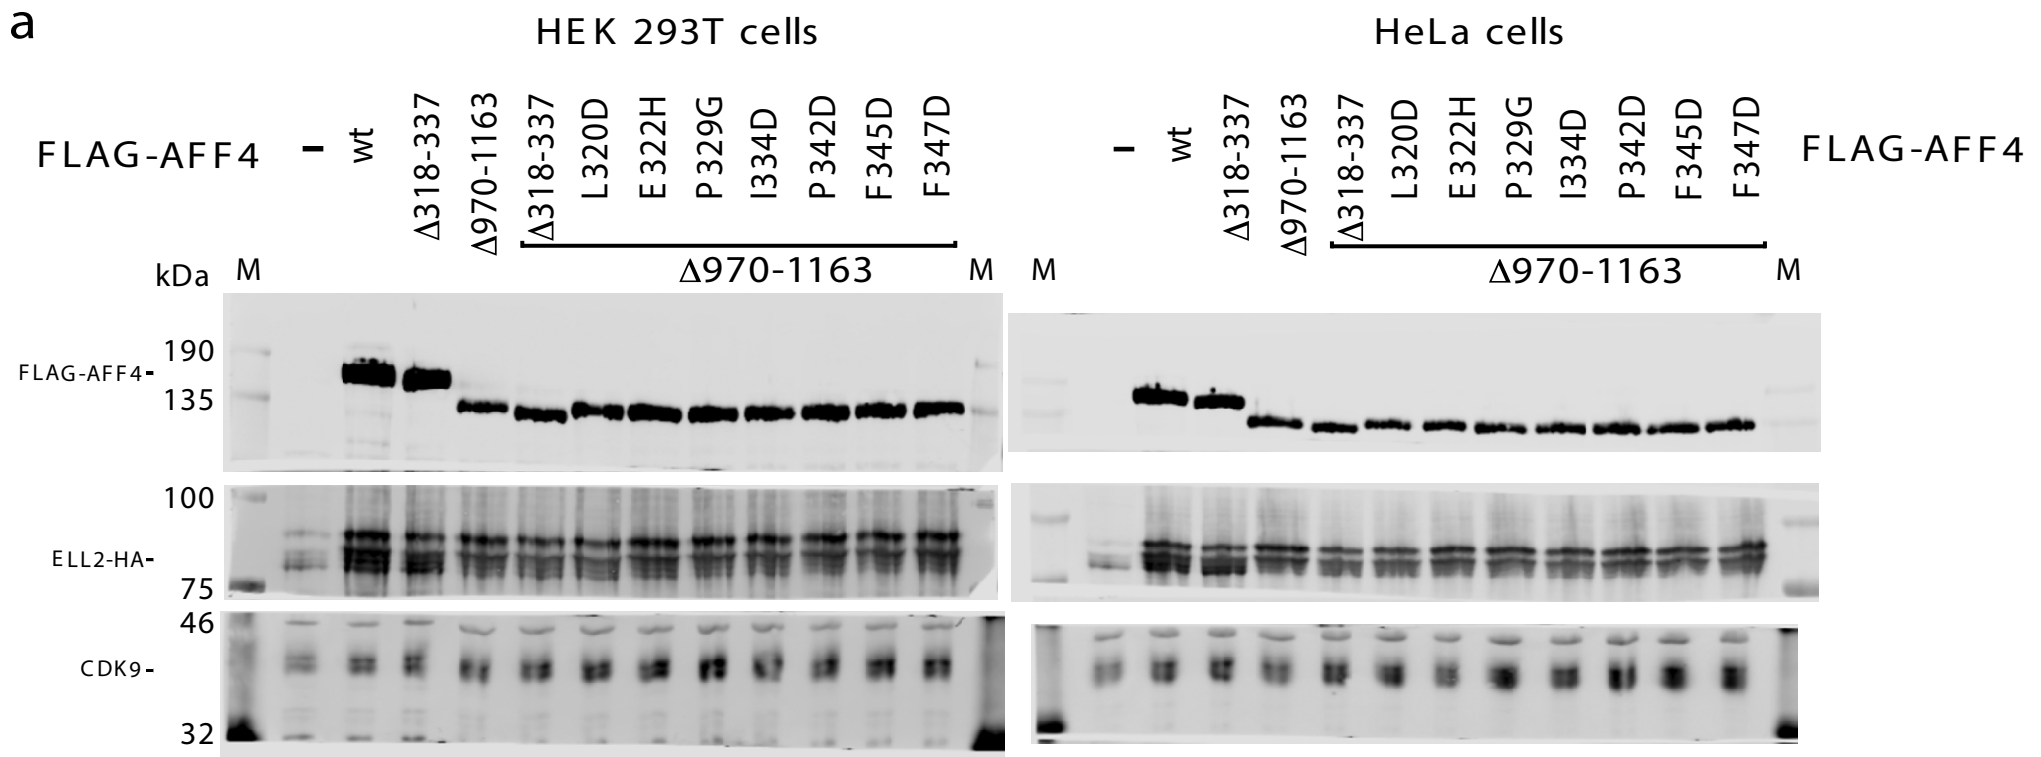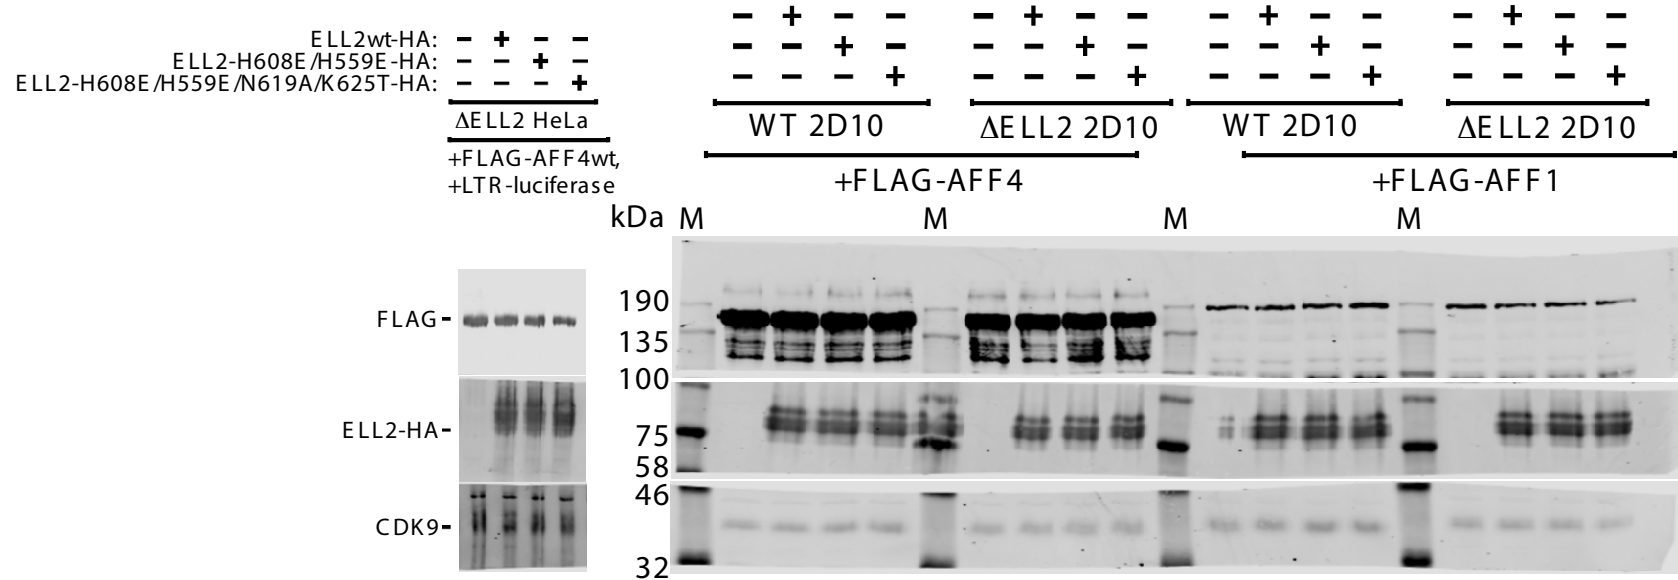

Supplementary Figure 6. Uncropped versions of the gels shown in Figure 7.

**Supplementary Table 1.**  $K_d$  values for AFF4-ELL2 binding as determined by fluorescence anisotropy. Fluorescence anisotropy data in Figure 5a, b were fitted with a single site binding model. NA means fitting was not applicable because of very low affinity binding.

| <b>AFF4 construct/mutation</b>     | <b><math>K_d</math> (<math>\mu</math>M)</b> | <b><math>R^2</math></b> |
|------------------------------------|---------------------------------------------|-------------------------|
| WT, 300-350 +His <sub>6</sub> -tag | 0.086 + 0.024                               | 0.97                    |
| WT, 318-350 peptide                | 4.0 + 1.57                                  | 0.91                    |
| V316D                              | 0.23 + 0.048                                | 0.99                    |
| I319D/L320D                        | 5.4 + 1.87                                  | 0.92                    |
| M323D                              | 2.7 + 1.14                                  | 0.88                    |
| D317P/E318P                        | 0.80 + 0.18                                 | 0.99                    |
| K321P                              | 0.24 + 0.06                                 | 0.98                    |
| E322H                              | 0.13 + 0.033                                | 0.99                    |
| W327D                              | 0.37 + 0.086                                | 0.96                    |
| P328G/P329G                        | 0.27 + 0.098                                | 0.97                    |
| L331D                              | 1.6 + 0.31                                  | 0.98                    |
| T332K                              | 0.069 + 0.037                               | 0.97                    |
| I334D                              | 0.67 + 0.21                                 | 0.95                    |
| L331D/I334D                        | 1.9 + 0.51                                  | 0.97                    |
| P342D                              | 0.2 + 0.05                                  | 0.99                    |
| F345D/F347D                        | 0.13 + 0.058                                | 0.97                    |
| I319D/L232D/M323D                  | NA                                          |                         |
| D317P/E318P/E322H                  | NA                                          |                         |
| M323D/L331D/I334D                  | NA                                          |                         |
| W327D/ L331D/I334D                 | NA                                          |                         |

Supplementary Table 2. Primers used for PCR and mutagenesis in this study.

| PCR for Recombinant expression  |                                                                                       |                                                                                             |
|---------------------------------|---------------------------------------------------------------------------------------|---------------------------------------------------------------------------------------------|
| Gene                            | Forward Primer                                                                        | Reverse Primer                                                                              |
| ELL2(519-640)                   | GTTGTTGGATCCGAACCTTCAGCAATTGAAC                                                       | CCTTCACTCGAGTTATTGCTGTTGGTCAAATTC                                                           |
| AFF4(300-350)                   | GTTGTTGGATCCCTTCCCAACCACTG                                                            | CCTTCACTCGAGTTACTCCTTAGTTGGAAAAG                                                            |
| ELL2(519-640)-4GS-AFF4(300-350) | CAAGCAGAGTCATGGTCCggtagtgtagtgtagtgtagtCC<br>TTCCCAACCACTG                            | CAGTGGTTGGGAAAGGactaccactaccactaccactaccGG<br>ACCATGACTCTGCTTG                              |
| AFF4(300-350)-4GS-ELL2(519-640) | CTTTTCCAACCTAAGGAGggtagtgtagtgtagtgtagtGAA<br>CCTTCAGCAATG                            | CAATTGCTGAAGGTTCActaccactaccactaccactaccCT<br>CCTTAGTTGGAAAAG                               |
| <b>mutations</b>                |                                                                                       |                                                                                             |
| <b>ELL2</b>                     |                                                                                       |                                                                                             |
| V593D                           | CATGAAGAAGaCTTACAAGAATATC                                                             | TTCTTGAAGtCTTCTCATGAAC                                                                      |
| H608E                           | CCCAATFACgaaGAAGAAAAATAC                                                              | TTTTCTTcttGTAATTGGGACTAG                                                                    |
| F548E                           | AAGGATGACgaaCAATGCAGAGTATG                                                            | CTCTGCATTGtGTCATCCTTATAATTC                                                                 |
| Y555E                           | TATGATGAGgaaCAGAGCTTTGCAATG                                                           | CAAAGCTCTGtCTCATCACTC                                                                       |
| H559E                           | AGAGCTTTGgaaGCCAGGATGGAG                                                              | CATCCTGGTtcaAAAGCTCTGTAC                                                                    |
| D632A                           | GAATTTGcaCAACAGCAAGCAG                                                                | CTGTTGtgCAAATTCACCTATTAG                                                                    |
| N619A                           | CTTCATgcaCAAGCTGGCTCACATC                                                             | CAGCTTgcaATGAAGATATTCACATC                                                                  |
| K625T                           | CACATCacAAGGATGATAGGTTG                                                               | CATCCTTgTgATGTGAGCCAGCTTG                                                                   |
| <b>AFF4</b>                     |                                                                                       |                                                                                             |
| V316D                           | TGTGAGCTGTGatGATGAAATC                                                                | TTTCATcatCACAGCTCACATC                                                                      |
| I319/320D                       | ATGAagaCgatAAAGAGATGAC                                                                | TCCTTateGtctTCATCCACACAG                                                                    |
| M323D                           | CTAAAAGAGgatACGCATTCATG                                                               | TGAATGCGTateCTCTTTTAGGATTTTC                                                                |
| 317D318E                        | AGCTGTGTGccTccAATCCTAAAAGAGATG                                                        | TTTAGGATTggAggCACACAGCTCAC                                                                  |
| K321P                           | GAAATCCTAaccAGAGATGACGCATTC                                                           | CGTCATCTCTggTAGGATTTTCATC                                                                   |
| E322H                           | ATCCTAAAacacATGACGCATTCATG                                                            | ATGCGTCAIgtgTTTAGGATTTTC                                                                    |
| W327D                           | ACGCATTCAgatCCTCCCTCTAAC                                                              | AGGGGGAGGatcTGAATGCGTCACTC                                                                  |
| L331D                           | CCTCCCTTgatACGGCTATTCATAC                                                             | AATAGCCGTateAGGGGGAGGCCATG                                                                  |
| D317A                           | TGTTGTGgcTGAATCCTAAAAAC                                                               | GATTTCaGCCACACAGCTCACATC                                                                    |
| T332K                           | CCTCTAAaGGCTATTCATACACCATG                                                            | AATAGCCctTAGAGGGGGAGGCCATG                                                                  |
| I334D                           | CTAACGGCTgaaTATACACCATG                                                               | TGGTGTATGAtcAGCCGTTAGAG                                                                     |
| P342D                           | AAAACAGAAgaTTCCAAATTTTC                                                               | AAATTTGGAAtcTTCTGTTTTGCAATG                                                                 |
| P3282930G                       | CATTCATGGggTggCggTCTAACGGCTATTTCTCATGGgg<br>TggCggTCTAACGGCTATTC                      | AGCCGTTAGAccGccAccCCATGAATGCGTCCGTT<br>AGAccGccAccCCATGAATGCGTCCATC                         |
| F345347D                        | CCTTCCAAAgatTCCTgaaTCCAACTAAGGAG                                                      | CTTAGTTGGAtcAGGAtcTTTGGAAAGTTTC                                                             |
| V316D/I319/320D/M323D/317D318E  | CTGTGatGATGAAgacgatAAAGAGgatACGCATTCATG<br>GTGGATGAAAgatAAAGAGgatACGCATTCATGGCC<br>TC | TGAATGCGTateCTCTTTategtcTTCATcatCACAGC<br>TCACATATGCGTateCTCTTTateGtctTCATCCAC<br>ACAGCTCAC |
| L331D/I334D                     | CCCTgatACGGCTgatCATAACCATG                                                            | GIATGatcAGCCGTateAGGGGGAGGCCATG                                                             |
| PCR for <i>In Vivo</i> Assay    |                                                                                       |                                                                                             |
| Gene                            | Forward Primer                                                                        | Reverse Primer                                                                              |
| AFF4-d318-337                   | GCTTCTGGTATGTGAGCTGTGTGGATTGCAAAC<br>AGAACCCTTCCAAATTTCTTTTCC                         | GTTCTGTTTTGCAATCCACACAGCTC                                                                  |
| AFF4-d970-1163                  | GAATCCAAATCCCATTCCTATGtgaTCGAGCATGC<br>ATCTAGAGGGC                                    | CTCGATCACATAGGGAATGGGG                                                                      |
| AFF4-L320D                      | ATGTGAGCTGTGTGGATGAAATCGaCAAAGAGATG<br>ACGCATTCATGGC                                  | TCATCTCTTTGTCGATTTTCATCCAC                                                                  |
| AFF4-E322H                      | AGCTGTGTGGATGAAATCCTAAAACATGACGCA<br>TTCATGGCTCCC                                     | TGCGTCATGTGTTTTAGGATTTTCATC                                                                 |
| AFF4-P329G                      | AGAGATGACGCATTCATGGCCTGGTCTCTAACGGC<br>TATTCATACACC                                   | CGTTAGAGGACCAGGCCATGAATG                                                                    |
| AFF4-I334D                      | GGCCTCCCTCTAACGGCTGACATACACCATGCA<br>AAACAGAACCC                                      | ATGGTGTATGTGTCAGCCGTTAGAG                                                                   |
| AFF4-P342D                      | GCTATTCATACACCATGCAAACAGAAgACTCCAA<br>ATTTCTCTTTCCAACTAAGG                            | AAAGGAAATTTGGAGTCTTCTGTTTTGC                                                                |
| AFF4-F345D                      | CCATGCAAACAGAACCTTCCAAAGACCCCTTTTCC<br>AACTAAGGAGTCTCA                                | GTTGGAAAAGGGTCTTTGGAAGGTT                                                                   |
| AFF4-F347D                      | CAAAACAGAACCTTCCAAATTTCTGACCCAACTA<br>AGGAGTCTCAGCAGT                                 | TCCTTAGTTGGGTCAGGAAATTTGG                                                                   |
| ELL2-N619A/K625T                | GAAAAATACAGATGTGAATATCTTCATgcaAAGCTGG<br>CTCACATCaccAGGCTAATAGGTGAATTTGACCAAC         | GTGATGTGAGCCAGCTTTGCATG                                                                     |
| ELL2-H559E                      | GAGTATGATGAGTACAGAGCTTTGgagGCCAGGATG<br>GAGACTGTAGCTAG                                | CATCTGCGCTCCAAAGCTCTG                                                                       |
| ELL2-H608E                      | GATAAAGCAGTCTAGTCCCAATTACgagGAAGAAAA<br>ATACAGATGTGAATATCTTC                          | GTATTTTCTCTCGTAATTTGGGACTAG                                                                 |
